# Supplementary material
Source: PubMed Central journal article supplement (PMC2613658)
Supplement: tpc.108.061341_1.pdf [file tpc.108.061341_1.pdf]

Supplemental Data. Myouga et al. (2008). A heterocomplex of iron superoxide dismutases defends chloroplast nucleoids against oxidative stress and is essential for chloroplast development in *Arabidopsis*.

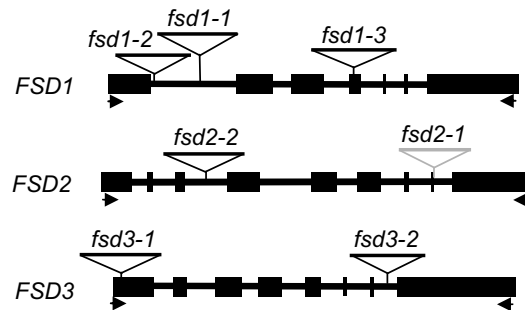

**Supplemental Figure 1. Structure of *FSD1*, *FSD2*, and *FSD3* genes and their *Ds*/T-DNA insertion sites.**

Three T-DNA insertion sites in the *FSD1* gene (At4g25100), one T-DNA insertion site and one *Ds* insertion site in the *FSD2* gene (At5g51100), and two T-DNA insertion sites in the *FSD3* gene (At5g23310) were mapped. Insertion positions for lines GABI\_740E11 (*fsd1-2*), SALK\_029455 (*fsd1-1*), GABI\_341D04 (*fsd1-3*), SALK\_080457 (*fsd2-2*), 11-6562-1 (*fsd2-1*), SALK\_103228 (*fsd3-1*), and SAIL\_224\_E05 (*fsd3-2*) are indicated. Exons are represented by filled black boxes, introns by lines, T-DNA insertion sites by black triangles, and *Ds* insertion site by gray triangle. Short arrows show the positions of primers used for RT-PCR analysis.



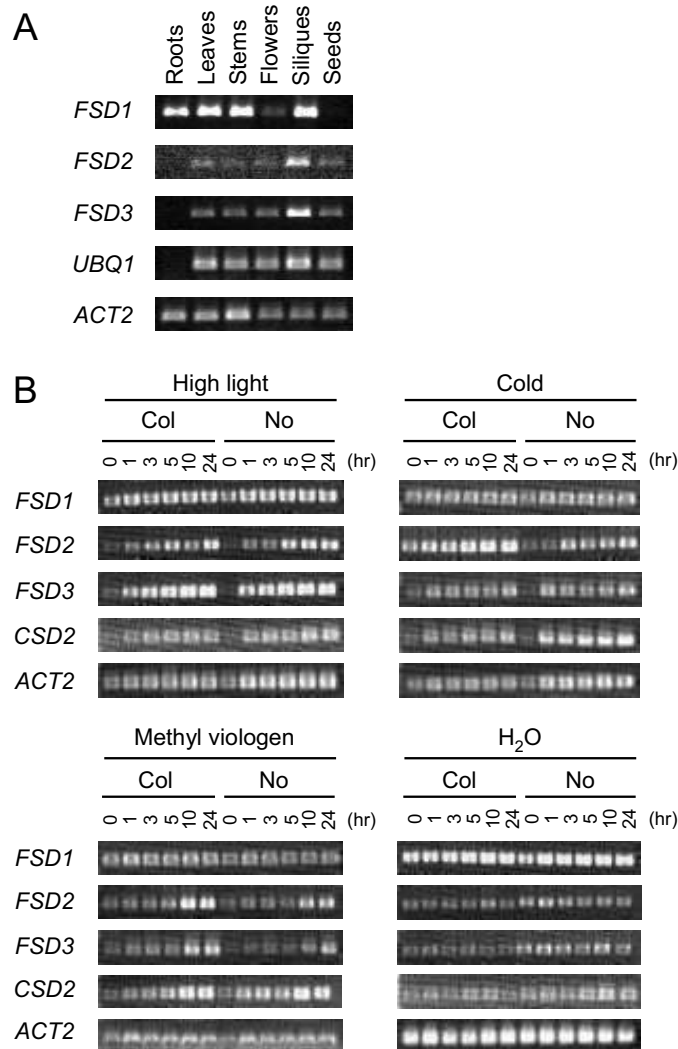

**Supplemental Figure 3. RT-PCR analysis of transcripts of *FSD1*, -2, -3, and *CSD2* in wild-type plants.**

(A) RT-PCR analyses showing transcript levels in the organs indicated. *Ubiquitin1* (UBQ1) and *Actin2* (ACT2) were used as controls. Two replicates were performed. (B) *FSD1*, *FSD2*, *FSD3*, and *CSD2* expression was induced in response to oxidative stress. Wild-type plants (Columbia [Col] and Nossen [No] ecotypes) were treated with high light (photon flux density  $240 \mu\text{mol m}^{-2} \text{s}^{-1}$ ), cold ( $4 \text{ }^\circ\text{C}$ ), methyl viologen ( $10 \mu\text{M}$ ), or water (as a negative control) for the numbers of hours indicated. The level of actin transcript was used as a control. Two replicates were performed.

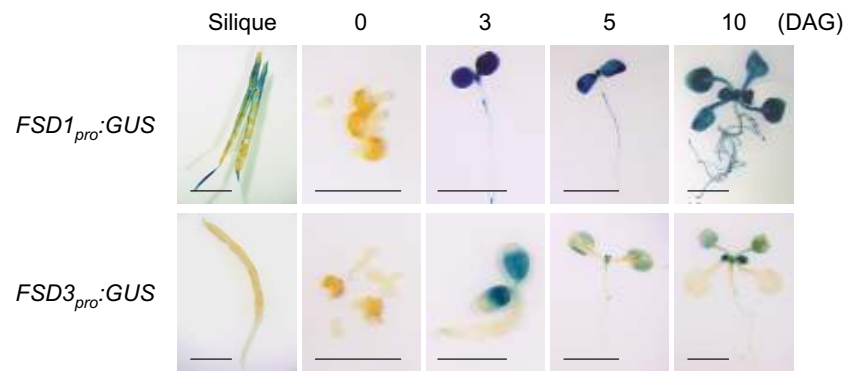

**Supplemental Figure 4. Activity of the *FSD1* and *FSD3* promoters is tissue-specific.** GUS expression patterns of *FSD1<sub>pro</sub>:GUS* and *FSD3<sub>pro</sub>:GUS*-transformed *Arabidopsis* plants (Columbia ecotype) are shown at different developmental stages. Whole seedlings were grown for the number of days after germination (DAG) indicated and siliques were processed for GUS histochemical staining, as described before (Myouga et al., 2006). Each construct was transformed into six *Arabidopsis* plants and data for line 5 are shown; five other lines gave comparable results. Scale bar, 1cm.

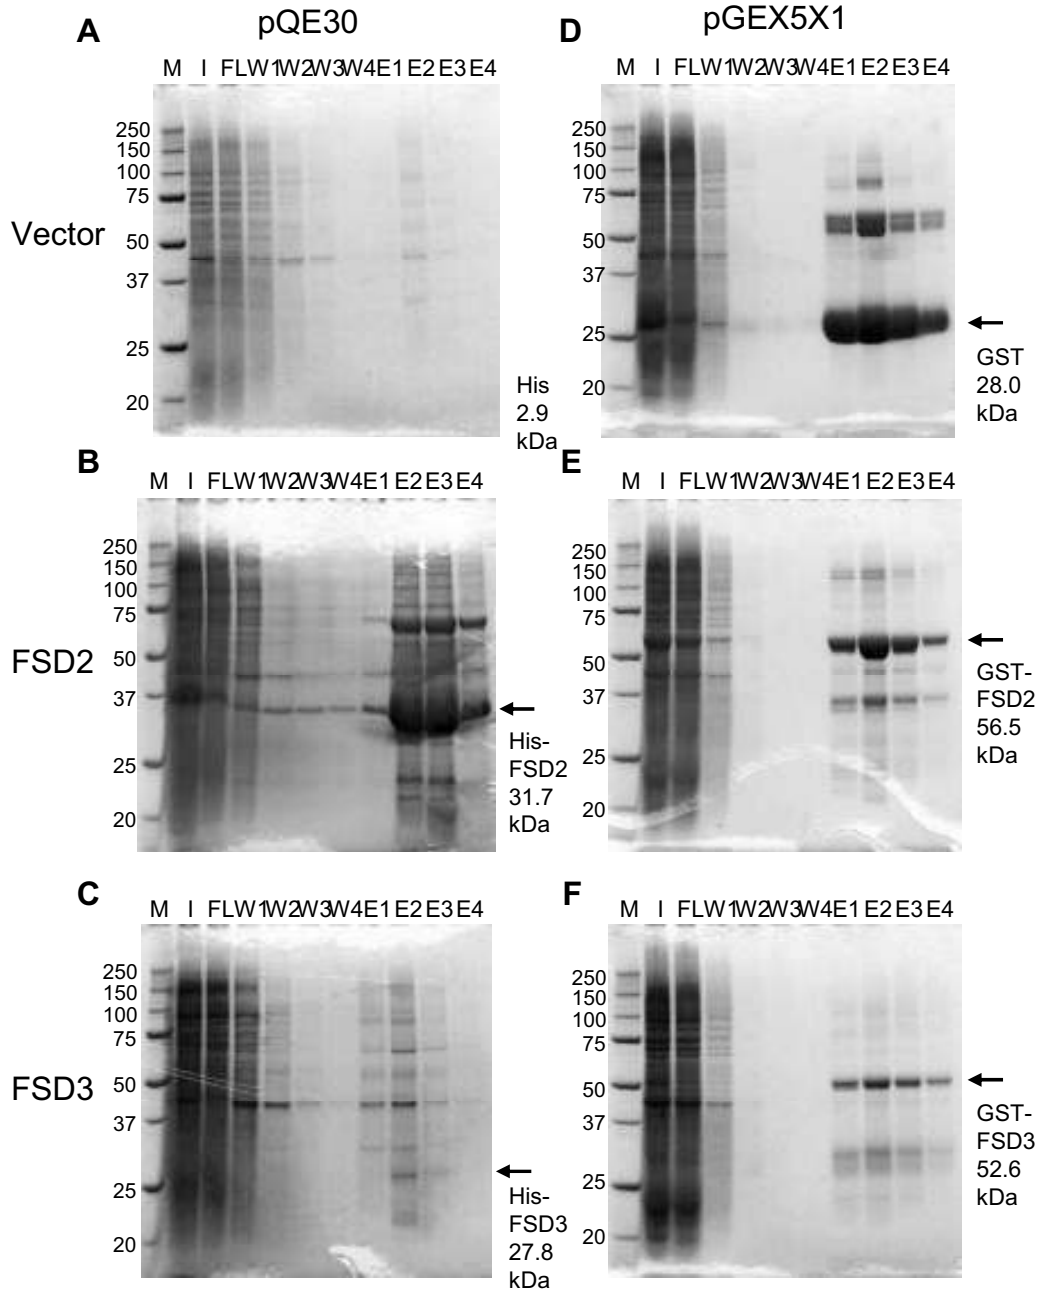

**Supplemental Figure 5. Total soluble protein profiles of IPTG-induced *E. coli* cells containing the tagged constructs indicated.**  
 Fifteen microliters of IPTG-induced crude extract (I), flow-through (FL), wash (W1–W4), or eluate (E1–E4) was subjected to 12.5% SDS-PAGE and stained with Coomassie brilliant blue. **(A)** pQE30-vector; **(B)** pQE30-FSD2; **(C)** pQ30-FSD3; **(D)** pGEX5X1-vector; **(E)** pGEX5X1-FSD2; **(F)** pGEX5X1-FSD3. Arrows denote induced FSD proteins and show predicted molecular weights of the fusion proteins. Molecular weights (M) of protein markers are shown on the left.

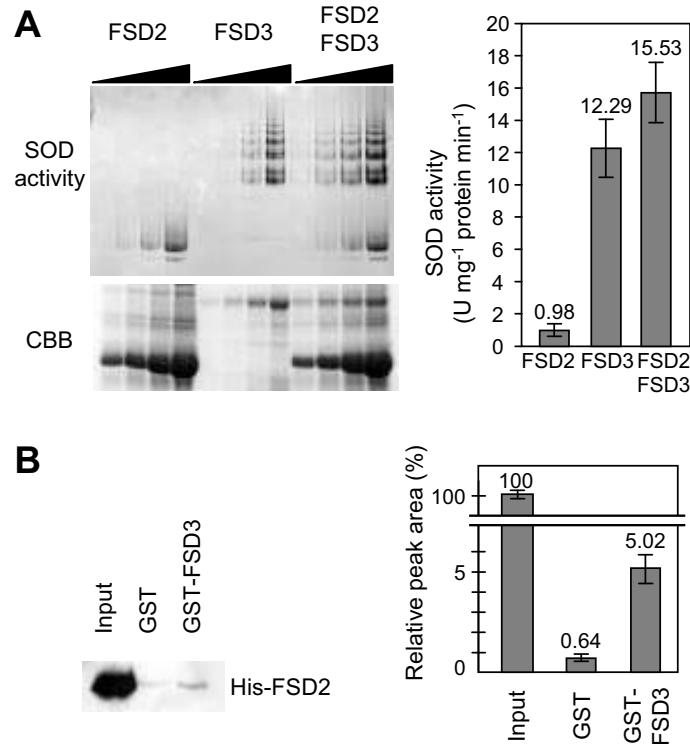

**Supplemental Figure 6. SOD (superoxide dismutase) activity of recombinant FSD2 and FSD3 proteins.**

**(A)** Recombinant FSD2 proteins purified by Ni-column (His-FSD2) and FSD3 proteins purified by glutathione Sepharose 4B column (GST-FSD3) were subjected to 10% native-PAGE and their SOD activities were visualized (upper panel). The same amounts of proteins were subjected to 10% SDS-PAGE and stained with Coomassie brilliant blue as a loading control (lower panel). To form heterocomplexes, 1 volume of His-FSD2 and 1/10 volume of GST-FSD3 were mixed together and incubated at 4 °C for 2 h. The amount of protein applied to each lane was about 2.5 µg (lane 1), 5 µg (lane 2), 10 µg (lane 3), 20 µg (lane 4), 0.25 µg (lane 5), 0.5 µg (lane 6), 1 µg (lane 7), 2 µg (lane 8), 2.75 µg (lane 9), 5.5 µg (lane 10), 11 µg (lane 11), and 22 µg (lane 12). The enzyme activities of both His-FSD2 and GST-FSD3 homodimers and their heterodimer were assayed (right panel). Data represent the means ± S.D. of three separate experiments ( $N=15$ ). **(B)** His-FSD2 interacted weakly with GST-FSD3 *in vitro*. Proteins were separated by 12.5% SDS-PAGE gel and His-FSD2 was detected by anti-His antibody (left panel) and histograms of relative areas of peak intensities were shown (right panel). Lane 1 represents 10% of the amount of input protein added to the bait beads mixture. Lanes 2 and 3 were reactions using GST alone and GST-tagged FSD3 as the bait protein, respectively. Values were calculated using ImageJ program that can measure areas of peak intensities. Peak areas of Lane 2 and 3 were normalized against that of the peak area measured in Lane 1.

**Supplemental Table 1.** Restoration of greening in pale green mutants grown under low light conditions.

A

|              | WT (No) | WT (Col) | <i>fsd1-1</i> | <i>fsd2-1</i> | <i>fsd3-1</i> |
|--------------|---------|----------|---------------|---------------|---------------|
| <i>Fv/Fm</i> | 0.83    | 0.83     | 0.83          | 0.45          | 0.49          |
| <i>NPQ</i>   | 0.78    | 0.79     | 0.68          | 0.24          | 0.34          |
| <i>qL</i>    | 0.58    | 0.59     | 0.55          | 0.72          | 0.68          |

B

|                        | WT (No) | WT (Col) | <i>fsd1-1</i> | <i>fsd2-1</i> | <i>fsd3-1</i> | <i>fsd2-1</i> /No | <i>fsd3-1</i> /Col |
|------------------------|---------|----------|---------------|---------------|---------------|-------------------|--------------------|
| Normal light<br>1% Suc | 0.79    | 0.75     | 0.85          | 0.066         | 0.024         | 8.30%             | 3.20%              |
| Low light<br>1% Suc    | 0.48    | 0.47     | 0.47          | 0.17          | 0.075         | 35%               | 15%                |

C

|              | Sucrose | WT (No) | WT (Col) | <i>fsd1-1</i> | <i>fsd2-1</i> | <i>fsd3-1</i> | <i>fsd2-1</i> /No | <i>fsd3-1</i> /Col |
|--------------|---------|---------|----------|---------------|---------------|---------------|-------------------|--------------------|
| Normal light | 1%      | 6.83    | 4.82     | 5.08          | 2.63          | 2.00          | 38%               | 41%                |
|              | 3%      | 8.00    | 5.81     | 6.09          | 4.90          | 3.33          | 61%               | 57%                |
| Low light    | 1%      | 2.41    | 2.33     | 1.90          | 1.70          | 1.72          | 70%               | 73%                |
|              | 3%      | 3.66    | 3.25     | 3.41          | 3.09          | 2.87          | 84%               | 88%                |

**(A)** Measurement of chlorophyll fluorescence in one-week-old plants grown under normal light conditions. *Fv/Fm*, *NPQ* and *qL* indicate the maximal efficiency of PSII photochemistry, the non-photochemical quenching coefficient and a parameter estimating the fraction of PSII centers in open states, respectively. All values are means of five leaf measurements. **(B)** Chlorophyll content in ten-day-old wild type and *fsd* mutants grown under normal or low light conditions. In addition to the chlorophyll contents (mg/g) of each plant, the ratio of the chlorophyll content of each *fsd* mutant to that of the wild-type plants is shown in the far-right columns. Three replicates were performed. **(C)** Leaf size in ten-day-old wild type and *fsd* mutants grown under normal light or low light on media supplemented with 1% or 3% sucrose. In addition to the leaf size (mm) of each plant, the ratio of average leaf size of each *fsd* mutant to that of the wild type plants is shown in the far-right columns. Each mean value is obtained at least twenty leaf experiments. Col: Columbia; No: Nossen

**Supplemental Table 2.** Prediction of targeting sequences and subcellular localization of SOD (superoxide dismutase) in *Arabidopsis* by different software tools.

| Gene name<br>(AGI code) | TargetP             |                  | WOLF PSORT          |                  | Predator            | PCLR                |
|-------------------------|---------------------|------------------|---------------------|------------------|---------------------|---------------------|
|                         | Prediction<br>score | (Peptide length) | Prediction<br>score | (Peptide length) | Prediction<br>score | Prediction<br>score |
| FSD1<br>(At4g25100)     | –<br>0.128          | –                | Chlo<br>6           | –                | –<br>0              | –<br>0.078          |
| FSD2<br>(At5g51100)     | cTP<br>0.771        | 46               | Chlo<br>11          | 24               | Chlo<br>0.12        | Chlo<br>0.674       |
| FSD3<br>(At5g23310)     | cTP<br>0.945        | 41               | Chlo<br>12          | 15               | Chlo<br>0.46        | Chlo<br>0.945       |
| CSD1<br>(At1g08830)     | –<br>0.118          | –                | Cyto<br>14          | –                | 0.02                | –<br>0.014          |
| CSD2<br>(At2g28190)     | cTP<br>0.96         | 61               | Chlo<br>13          | 24               | Chlo<br>0.95        | Chlo<br>0.988       |
| CSD3<br>(At5g18100)     | –<br>0.069          | –                | Pero<br>9           | 32               | 0.02                | –<br>0.034          |
| MSD1<br>(At3g10920)     | mTP<br>0.796        | 6                | Mito<br>10          | 13               | Mito<br>0.52        | –<br>0.019          |
| MSD-like<br>(At3g56350) | SP<br>0.957         | 23               | Extr<br>7           | 23               | ER<br>0.99          | –<br>0.003          |

Score, accuracy, or confidence of a given prediction of each SOD gene by TargetP, WOLF PSORT, Predator, and PCLR programs is shown under the name of the predicted location in each column. The predicted length of targeting sequences (peptide length, given in amino acids) is indicated. “–” denotes negative prediction. cTP, chloroplast transit peptide; mTP, mitochondrial targeting peptide; SP, secretory signal peptides required for translocation across the cytoplasmic membrane through endoplasmic reticulum (ER)/Golgi apparatus; Extr, extracellular; Cyto, cytosolic; Chlo, chloroplast; Mito, mitochondria; Pero, peroxisome; ER, endoplasmic reticulum.



**Supplemental Table 3.** Bonferroni multiple comparison test.

| Comparison           | Mean Difference | <i>t</i> | P value     |
|----------------------|-----------------|----------|-------------|
| WT vs FSD2-OE        | -111.13         | 3.242    | * P<0.05    |
| WT vs FSD3-OE        | -100.05         | 2.919    | * P<0.05    |
| WT vs CSD2-OE        | -179.87         | 5.248    | *** P<0.001 |
| WT vs Double-OE      | -245.6          | 7.165    | *** P<0.001 |
| FSD2-OE vs FSD3-OE   | 11.083          | 0.3234   | ns P>0.05   |
| FSD2-OE vs CSD2-OE   | -68.733         | 2.005    | ns P>0.05   |
| FSD2-OE vs Double-OE | -134.47         | 3.923    | ** P<0.01   |
| FSD3-OE vs CSD2-OE   | -79.817         | 2.329    | ns P>0.05   |
| FSD3-OE vs Double-OE | -145.55         | 4.246    | *** P<0.001 |
| CSD2-OE vs Double-OE | -65.733         | 1.918    | ns P>0.05   |

The significance of differences between control and test values was determined by the two-tailed multiple *t*-test with Bonferroni correction (four comparisons in five groups). If the value of *t* is greater than 2.828 then the P value is less than 0.05 (\*P<0.05). Mean difference indicates a measure of statistical dispersion.

**Supplemental Table 4.** Nucleotide sequences of gene-specific primers.

| Nucleotide sequences of gene-specific primers used to confirm <i>Ds</i> or T-DNA insertion                                |                       |                                     |
|---------------------------------------------------------------------------------------------------------------------------|-----------------------|-------------------------------------|
| <i>fsd1-1</i>                                                                                                             | <i>FSD1</i> -Fw       | 5'-GTAGGAACGGGTCAAGTTGG-3'          |
|                                                                                                                           | <i>FSD1</i> -Rv       | 5'-CCTTCAAGCTCGGTTCCAAG-3'          |
| <i>fsd1-2</i>                                                                                                             | <i>FSD1</i> -Fw2      | 5'-GTGTGCTCTCCTCACTTCA-3'           |
|                                                                                                                           | <i>FSD1</i> -Rv2      | 5'-CCTTCAAGCTCGGTTCCAAG-3'          |
| <i>fsd1-3</i>                                                                                                             | <i>FSD1</i> -Fw3      | 5'-CAACGCTGCTCAGGTGATAA-3'          |
|                                                                                                                           | <i>FSD1</i> -Rv3      | 5'-GGCACTTACAGCTTCCCAAG-3'          |
| <i>fsd2-1</i>                                                                                                             | <i>FSD2</i> -Fw       | 5'-GCTCGTATGGGATTATTCTG-3'          |
|                                                                                                                           | <i>FSD2</i> -Rv       | 5'-CTCTGGTACTTCATCATCTGG-3'         |
| <i>fsd2-2</i>                                                                                                             | <i>FSD2</i> -Fw2      | 5'-GTGGCTGTTTCCGGTGTTAT-3'          |
|                                                                                                                           | <i>FSD2</i> -Rv2      | 5'-ACGACCAACACAGAGTAAGC-3'          |
| <i>fsd3-1</i>                                                                                                             | <i>FSD3</i> -Fw       | 5'-AGCTCACGGCTTGAATCTTG-3'          |
|                                                                                                                           | <i>FSD3</i> -Rv       | 5'-GACCGTAGTAAGCTTCAACC-3'          |
| <i>fsd3-2</i>                                                                                                             | <i>FSD3</i> -Fw2      | 5'-CGGAATCCTTTACCCGAGTT-3'          |
|                                                                                                                           | <i>FSD3</i> -Rv 2     | 5'-AGACTGCCCAAGTTTCCA-3'            |
| <i>csd2-1</i>                                                                                                             | <i>CSD2</i> -Fw       | 5'-GCCGAATTTGAGAAACCAAGT-3'         |
|                                                                                                                           | <i>CSD2</i> -Rv       | 5'-TTCACAGAACCATTGAATCAGC-3'        |
| SALK                                                                                                                      | T-DNA internal primer | 5'-ACCACCATCAAACAGGATTTTC-3'        |
| GABI-Kat                                                                                                                  | T-DNA internal primer | 5'-ATATTGACCATCATACTCATTGC-3'       |
| SAIL                                                                                                                      | T-DNA internal primer | 5'-TTCATAACCAATCTCGATACAC-3'        |
| Nucleotide sequences of gene-specific primers used for RT-PCR analysis                                                    |                       |                                     |
| <i>FSD1</i>                                                                                                               | Fw                    | 5'-TCAAGTGCTGTCACCGCAA-3'           |
|                                                                                                                           | Rv                    | 5'-TTAAGCAGAAGCAGCCTTGG-3'          |
| <i>FSD2</i>                                                                                                               | Fw                    | 5'-TGAATGTTGCAGTGACAGCC-3'          |
|                                                                                                                           | Rv                    | 5'-TCTTTGCACTGCTCGAGCAA-3'          |
| <i>FSD3</i>                                                                                                               | Fw                    | 5'-AGACCAAGAGTGCGAAGTAG-3'          |
|                                                                                                                           | Rv                    | 5'-TTCACAAACGCTTCTGCACG-3'          |
| <i>CSD1</i>                                                                                                               | Fw                    | 5'-TGGCGAAAGGAGTTGCAGTT-3'          |
|                                                                                                                           | Rv                    | 5'-TGGCAATCAGTGATTGTGAAG-3'         |
| <i>CSD2</i>                                                                                                               | Fw                    | 5'-GCATTCTCATCTCCTTCTCG-3'          |
|                                                                                                                           | Rv                    | 5'-GTTTCCAGTGGTCAGACTAA-3'          |
| <i>CSD3</i>                                                                                                               | Fw                    | 5'-AGAGGAAATCTGAGAGCGGT-3'          |
|                                                                                                                           | Rv                    | 5'-AGATTTCAAGCAACACCGTTTG-3'        |
| <i>MSD1</i>                                                                                                               | Fw                    | 5'-GAGGATCAGAGGGATTGAGA-3'          |
|                                                                                                                           | Rv                    | 5'-TGGCACTACCAAGAGATCCT-3'          |
| <i>MSD-like</i>                                                                                                           | Fw                    | 5'-TGGAACCGTGTCTCGAATCA-3'          |
|                                                                                                                           | Rv                    | 5'-CAAAGGATCATGCGGTGGTT-3'          |
| <i>ACT2</i>                                                                                                               | Fw                    | 5'-CTAAGCTCTCAAGATCAAAGG-3'         |
|                                                                                                                           | Rv                    | 5'-ACATTGCAAAGAGTTTCAAGGT-3'        |
| <i>UBQ1</i>                                                                                                               | Fw                    | 5'-CGACAATGTCAAGGCCAAGA-3'          |
|                                                                                                                           | Rv                    | 5'-TGGTTGCTGTGACCACACTT-3'          |
| Nucleotide sequences of gene-specific primers used in complementation tests of mutants and construction of overexpressors |                       |                                     |
| <i>FSD1</i> cDNA                                                                                                          | Fw                    | 5'-CACCATGGCTGCTTCAAGTGCTGTCACCG-3' |
|                                                                                                                           | Rv                    | 5'-AGCAGAAGCAGCCTTGGCG-3'           |
| <i>FSD2</i> pro-moter + gene                                                                                              | Fw                    | 5'-CACCAAGATGACAGAAGGGAAGCAGT-3'    |
| <i>FSD2</i> cDNA                                                                                                          | Fw                    | 5'-CACCATGATGAATGTTGCAGTGACAGC-3'   |
|                                                                                                                           | Rv                    | 5'-GTCAACCTCAGATACATCG-3'           |
| <i>FSD3</i> pro-moter + gene                                                                                              | Fw                    | 5'-CACCAAGTCTGCAGTATTGGGTGATG-3'    |

|                                                                                                               |    |                                         |
|---------------------------------------------------------------------------------------------------------------|----|-----------------------------------------|
| <i>FSD3</i> cDNA                                                                                              | Fw | 5'-CACCATGAGTTCTTGTGTTGTGACGAC-3'       |
|                                                                                                               | Rv | 5'-AGCGATTGGGATGTTGGGTT-3'              |
| <i>CSD2</i> cDNA                                                                                              | Fw | 5'-CACCATGGCTGCCACCAACACAATC-3'         |
|                                                                                                               | Rv | 5'-GAGCGGCGTCAAGCCAATCA-3'              |
| M13                                                                                                           | Fw | 5'-GTA AACGACGGCCAG-3'                  |
|                                                                                                               | Rv | 5'-CAGGAAACAGCTATGAC-3'                 |
| pGWB internal primer                                                                                          | Fw | 5'-CAAGTTTGTACAAAAAGCAGG-3'             |
|                                                                                                               | Rv | 5'-CCACTTTGTACAAGAAAGCTG-3'             |
| pBE-F internal primer                                                                                         | Fw | 5'-CTATCCTTCGCAAGACCTTCCTC-3'           |
|                                                                                                               | Rv | 5'-GATGTGCTGCAAGGCGATTAAGTTG-3'         |
| Nucleotide sequences of gene-specific primers used for promoter-GUS constructs                                |    |                                         |
| <i>FSD1</i> promoter                                                                                          | Fw | 5'-CACCGAAGTAAACCAAGCCCCTCA-3'          |
|                                                                                                               | Rv | 5'-AGCCATTCTTTGTAATTGAAGC-3'            |
| <i>FSD2</i> promoter                                                                                          | Fw | 5'-CACCAAGATGACAGAAGGGAAGCAGT-3'        |
|                                                                                                               | Rv | 5'-ATTCATCATCTTCACTCAAAGCG-3'           |
| <i>FSD3</i> promoter                                                                                          | Fw | 5'-CACCAAGTCTGCAGTATTGGGTGATG-3'        |
|                                                                                                               | Rv | 5'-ACTCATAGTTCCTCCACT-3'                |
| <i>CSD2</i> promoter                                                                                          | Fw | 5'-CACCCGAGAACCCCGTGGATGTATT-3'         |
|                                                                                                               | Rv | 5'-AGCCATGGCTGCTGCTATGT-3'              |
| Nucleotide sequences of gene-specific primers used in yeast two-hybrid analysis and immunoprecipitation assay |    |                                         |
| <i>FSD1</i>                                                                                                   | Fw | 5'-CGGAATTCATGGCTGCTTCAAGTGCTGTC-3'     |
|                                                                                                               | Rv | 5'-CGGGATCCTTAAGCAGAAGCAGCCTTGGC-3'     |
| <i>FSD2</i> (-cTP)                                                                                            | Fw | 5'-CGGAATTCATGGGTGTTATCACAGCTGGATTTG-3' |
|                                                                                                               | Rv | 5'-CGGGATCCTTAGTCAACCTCAGATACATCG-3'    |
| <i>FSD2</i> (+cTP)                                                                                            | Fw | 5'-CGGAATTCATGATGAATGTTGCAGTGACAGC-3'   |
| <i>FSD3</i> (-cTP)                                                                                            | Fw | 5'-CGGAATTCATGGGTGTTTTAAAGTTGAAGCTTA-3' |
|                                                                                                               | Rv | 5'-CGGGATCCTTAAGCGATTGGGATGTTGGGTT-3'   |
| <i>FSD3</i> (+cTP)                                                                                            | Fw | 5'-CGGAATTCATGAGTTCTTGTGTTGTGACGAC-3'   |
| <i>CSD2</i> (-cTP)                                                                                            | Fw | 5'-CGGAATTCATGTCCGCGGCGAAGAAGGCTG-3'    |
|                                                                                                               | Rv | 5'-CGGGATCCTTAGAGCGGCGTCAAGCCAAT-3'     |
| <i>CSD2</i> (+cTP)                                                                                            | Fw | 5'-CGGAATTCATGGCTGCCACCAACACAATC-3'     |
| pGBK internal primer                                                                                          | Fw | 5'-TCATCGGAAGAGAGTAGT-3'                |
|                                                                                                               | Rv | 5'-GTCACCTTTAAAATTTGTATAC-3'            |
| pGAD internal primer                                                                                          | Fw | 5'-CTATTCGATGATGAAGATACCCACCAAACCC-3'   |
|                                                                                                               | Rv | 5'-GTGAACCTGCGGGTTTTTCAGTATCTACGATT-3'  |
| Nucleotide sequences of gene-specific primers used in qRT-PCR analysis                                        |    |                                         |
| <i>FSD1</i>                                                                                                   | Fw | 5'-AAGTGCTGTCACCGCAAAC-3'               |
|                                                                                                               | Rv | 5'-CAAGAAGCTCTCCTGATGGT-3'              |
| <i>FSD2</i>                                                                                                   | Fw | 5'-CACAGCTGGATTTGAGCTGA-3'              |
|                                                                                                               | Rv | 5'-AATCTGAGGAGCTCTCCAGT-3'              |
| <i>FSD3</i>                                                                                                   | Fw | 5'-GGTCTCGAGGTGGTTTTAAAG-3'             |
|                                                                                                               | Rv | 5'-AACACCCTTTTGAGGCGTGT-3'              |
| <i>CSD2</i>                                                                                                   | Fw | 5'-GAAAGCGTTGACAGTTGTTTC-3'             |
|                                                                                                               | Rv | 5'-CATCGGCATTGGCATTATG-3'               |
| <i>UBQ1</i>                                                                                                   | Fw | 5'-GATGGCCGTACTTTGGCTGA-3'              |
|                                                                                                               | Rv | 5'-CAGCTCTGGGTGAAGACGA-3'               |
| Nucleotide sequences of gene-specific primers for plastid-encoded genes used in RT-PCR analysis               |    |                                         |
| <i>psaA</i>                                                                                                   | Fw | 5'-ATGATTATTCGTTTCGCCG-3'               |
|                                                                                                               | Rv | 5'-CGGTAAGATACATGTAC-3'                 |
| <i>psbA</i>                                                                                                   | Fw | 5'-TGCAATTTAGAGAGACGCG-3'               |
|                                                                                                               | Rv | 5'-AAGTTCCCACTCACGAC-3'                 |
| <i>petB</i>                                                                                                   | Fw | 5'-ATGAGTAAAGTTTATGATTGG-3'             |
|                                                                                                               | Rv | 5'-TTACACCAAAAAGATGCGGT-3'              |
| <i>clpP</i>                                                                                                   | Fw | 5'-CATGCCTATTGGCGTTCC-3'                |
|                                                                                                               | Rv | 5'-ATGGATCATTACCCTAGCG-3'               |
| <i>atnR</i>                                                                                                   | Fw | 5'-ATGAGAACAATCCTACTAC-3'               |

|              |    |                              |
|--------------|----|------------------------------|
| <i>arpD</i>  | Rv | 5'-TATGGATAGGAGATGTTGT-3'    |
| <i>ndhB</i>  | Fw | 5'-AGAGGAAATCTGAGAGCGGT-3'   |
|              | Rv | 5'-AGATTCAGCAACACCGTTTG-3'   |
| <i>accD</i>  | Fw | 5'-ATGGATGAAGACATGGTCTC-3'   |
|              | Rv | 5'-AACTAGCTGTCACTCCACC-3'    |
| <i>rpoA</i>  | Fw | 5'-CGATTCAACGATCTGATCAA-3'   |
|              | Rv | 5'-TTTCTAGAATGTCTAATATCTT-3' |
| <i>ycf2</i>  | Fw | 5'-ATGAAAGGACATCAATTC-3'     |
|              | Rv | 5'-CACTAAGATTTTGAATAG-3'     |
| <i>Actin</i> | Fw | 5'-CTAAGCTCTCAAGATCAAAGG-3'  |
|              | Rv | 5'-ACATTGCAAAGAGTTTCAAGGT-3' |
